# Supplementary material for: Pch2 Links Chromosome Axis Remodeling at Future Crossover Sites and Crossover Distribution during Yeast Meiosis
Source: PubMed Central journal article supplement (PMC2708914; doi:10.1371/journal.pgen.1000557), 2009-07-24
Supplement: pgen.1000557.s006.pdf [file pgen.1000557.s006.pdf]

**Table S1.** Crossover interference on three chromosomes in wild-type and *pch2Δ* at 33°C and 30°C.

A. Chromosome III

| Genotype;<br>Temperature            | Reference Interval |         | <i>his4-leu2</i> |                 | <i>leu2-CEN3</i> |                 | <i>CEN3-MAT</i>  |                  |
|-------------------------------------|--------------------|---------|------------------|-----------------|------------------|-----------------|------------------|------------------|
|                                     | Test Interval      |         | <i>leu2-CEN3</i> | <i>CEN3-MAT</i> | <i>his4-leu2</i> | <i>CEN3-MAT</i> | <i>his4-leu2</i> | <i>leu2-CEN3</i> |
| Wild type;<br>33°C                  | P                  | P:N:T   | 528:0:183        | 469:3:222       | 528:4:297        | 578:4:264       | 467:4:219        | 578:0:142        |
|                                     |                    | cM ± SE | 12.9±0.8         | 17.3±1.1        | 19.4±1.1         | 17.0±.9         | 17.6±1.2         | 9.9±.7           |
|                                     | T+N                | P:N:T   | 301:0:19         | 226:1:87        | 183:1:18         | 142:0:54        | 225:0:87         | 268:0:5          |
|                                     |                    | cM ± SE | 3.0±0.7          | 14.8±1.6        | 5.9±1.8          | 13.8±1.6        | 13.9±1.31        | .92±.41          |
|                                     | ratio              |         | .23±.05          | .86±.11         | .31±.09          | .81±.11         | .79±.09          | .09±.04          |
|                                     | sig (SE) †         |         | S                | N               | S                | N               | S                | N                |
| sig (p) *                           |                    | 9.35E-3 | .380             | .018            | .093             | .037            | 0.116            |                  |
| <i>pch2Δ</i> <sup>+</sup> ;<br>33°C | P                  | P:N:T   | 509:3:154        | 402:10:238      | 509:10:283       | 547:6:298       | 403:8:220        | 547:1:146        |
|                                     |                    | cM ± SE | 12.9±1.1         | 22.9±1.7        | 21.3±1.4         | 19.6±1.2        | 21.2±1.6         | 11.0±0.9         |
|                                     | T+N                | P:N:T   | 297:1:33         | 234:3:97        | 159:5:31         | 148:8:61        | 250:7:89         | 304:3:64         |
|                                     |                    | cM ± SE | 5.9±1.2          | 17.2±1.9        | 15.6±3.6         | 25.1±4.0        | 18.9±2.5         | 11.0±1.7         |
|                                     | ratio              |         | .46±.10          | .75±.10         | .73±.17          | 1.28±.21        | .89±.02          | 1.01±.17         |
|                                     | sig (SE) †         |         | S                | S               | N                | N               | N                | N                |
| sig (p) *                           |                    | 2.16E-3 | .041             | .128            | .183             | .145            | .124             |                  |
| sig (ratios) ‡                      |                    | N       | N                | S               | S                | N               | S                |                  |
| Wild type;<br>30°C                  | P                  | P:N:T   | 426:0:100        | 369:1:145       | 426:4:232        | 482:3:195       | 366:3:179        | 482:1:91         |
|                                     |                    | cM ± SE | 9.5±0.9          | 14.6±1.1        | 19.3±1.3         | 15.7±1.1        | 18.0±1.3         | 8.5±0.9          |
|                                     | T+N                | P:N:T   | 238:2:13         | 185:2:63        | 100:1:14         | 92:1:25         | 146:2:63         | 198:1:25         |
|                                     |                    | cM ± SE | 4.9±1.8          | 15.0±2.1        | 8.7±3.0          | 13.1±3.1        | 17.8±2.5         | 6.9±1.7          |
|                                     | ratio              |         | .52±.19          | 1.02±.16        | .45±.16          | .84±.21         | .99±.16          | .82±.22          |
|                                     | sig (SE) †         |         | S                | N               | S                | N               | N                | N                |
| sig (p) *                           |                    | 3.80E-2 | .630             | 6.86E-5         | .100             | .988            | .189             |                  |
| <i>pch2Δ</i> <sup>+</sup> ;<br>30°C | P                  | P:N:T   | 396:2:87         | 338:5:136       | 396:3:221        | 475:6:167       | 337:2:186        | 475:4:80         |
|                                     |                    | cM ± SE | 10.2±1.2         | 17.3±1.67       | 19.3±1.2         | 15.7±1.3        | 18.8±1.3         | 9.3±1.3          |
|                                     | T+N                | P:N:T   | 228:2:17         | 195:3:49        | 90:1:19          | 85:2:28         | 142:1:51         | 173:1:29         |
|                                     |                    | cM ± SE | 5.9±1.9          | 13.6±2.4        | 11.3±3.2         | 17.4±4.0        | 14.6±2.2         | 8.6±2.0          |
|                                     | ratio              |         | .58±.20          | .78±.16         | .59±.16          | 1.1±.28         | .78±.12          | .93±.24          |
|                                     | sig (SE) †         |         | N                | N               | S                | N               | N                | N                |
| sig (p) *                           |                    | .406    | .112             | .019            | .171             | .230            | .39              |                  |
| sig (ratios) ‡                      |                    | N       | N                | N               | N                | N               | N                |                  |

B. Chromosome VII

| Genotype;<br>Temperature | Reference Interval |          | <i>lys5-met13</i> |                  | <i>met13-cyh2</i> |                  | <i>cyh2-trp5</i>  |                   |
|--------------------------|--------------------|----------|-------------------|------------------|-------------------|------------------|-------------------|-------------------|
|                          | Test Interval      |          | <i>met13-cyh2</i> | <i>cyh2-trp5</i> | <i>lys5-met13</i> | <i>cyh2-trp5</i> | <i>lys5-met13</i> | <i>met13-cyh2</i> |
| Wild type;<br>33°C       | P                  | P:N:T    | 485:0:169         | 211:14:409       | 485:5:352         | 297:18:521       | 211:2:153         | 297:0:80          |
|                          |                    | cM ± SE  | 12.9±0.9          | 38.9±1.8         | 22.7±1.0          | 37.6±1.6         | 22.5±1.7          | 10.6±1.0          |
|                          | T+N                | P:N:T    | 357:1:28          | 155:6:221        | 169:0:29          | 80:2:119         | 422:2:224         | 539:1:119         |
|                          |                    | cM ± SE  | 4.4±1.0           | 33.6±2.1         | 7.3±1.3           | 32.6±2.6         | 18.2±1.1          | 9.5±0.9           |
|                          | ratio              |          | .34±.08           | .87±.07          | .32±.06           | .87±.08          | .81±.08           | .89±.12           |
|                          | sig (SE) †         |          | S                 | N                | S                 | N                | S                 | N                 |
| sig (p) *                |                    | 4.42E-3  | .753              | 5.79E-14         | .103              | 1.00E-6          | .17               |                   |
| <i>pch2Δ</i> '           | P                  | P:N:T    | 466:1:142         | 230:16:335       | 466:2:322         | 283:25:475       | 230:2:148         | 283:1:112         |
|                          |                    | cM ± SE  | 12.2±1.0          | 37.0±2.1         | 21.1±1.0          | 39.9±1.9         | 21.0±1.6          | 14.9±1.3          |
|                          | T+N                | P:N:T    | 324:1:53          | 153:12:202       | 143:2:50          | 115:5:84         | 433:1:263         | 606:0:116         |
|                          |                    | cM ± SE  | 7.8±1.2           | 37.3±2.8         | 15.9±2.6          | 27.9±3.5         | 19.3±0.0          | 8.0±0.7           |
|                          | ratio              |          | .64±.11           | 1.00±.09         | .75±.13           | .70±.09          | .92±.09           | .54±.07           |
|                          | sig (SE) †         |          | S                 | N                | N                 | S                | N                 | S                 |
| sig (p) *                |                    | 1.49E-2  | .870              | .057             | .051              | .164             | 7.02E-2           |                   |
| sig (ratios) ‡           |                    | S        | N                 | S                | N                 | N                | S                 |                   |
| Wild type;<br>30°C       | P                  | P:N:T    | 353:0:144         | 150:21:313       | 353:0:242         | 185:18:391       | 151:0:110         | 185:0:83          |
|                          |                    | cM ± SE  | 14.5±1.0          | 45.4±2.7         | 20.3±1.0          | 42.0±2.1         | 21.1±1.5          | 15.5±1.4          |
|                          | T+N                | P:N:T    | 243:1:25          | 111:4:153        | 144:1:25          | 83:8:79          | 333:1:154         | 409:1:85          |
|                          |                    | cM ± SE  | 5.8±1.4           | 33.0±2.5         | 9.1±2.2           | 37.4±4.9         | 16.4±1.2          | 9.2±1.0           |
|                          | ratio              |          | .40±.10           | .73±.07          | .45±.11           | .89±.12          | .78±.08           | .59±.09           |
|                          | sig (SE) †         |          | S                 | S                | S                 | N                | S                 | S                 |
| sig (p) *                |                    | 1.14E-3  | .007              | 1.86E-9          | .143              | 5.22E-4          | .015              |                   |
| <i>pch2Δ</i> '';<br>30°C | P                  | P:N:T    | 341:1:124         | 155:22:278       | 341:2:203         | 188:21:343       | 153:1:84          | 188:1:60          |
|                          |                    | cM ± SE  | 14.0±1.2          | 45.5±2.9         | 19.7±1.3          | 42.5±2.4         | 18.9±2.0          | 13.3±1.8          |
|                          | T+N                | P:N:T    | 206:2:32          | 87:3:153         | 125:1:33          | 64:5:96          | 298:2:149         | 364:2:99          |
|                          |                    | cM ± SE  | 9.2±2.0           | 35.2±2.4         | 12.3±2.4          | 38.2±4.1         | 17.9±1.4          | 11.9±1.3          |
|                          | ratio              |          | .66±.16           | .78±.07          | .62±.13           | .90±.11          | .95±.12           | .90±.16           |
|                          | sig (SE) †         |          | S                 | S                | S                 | N                | N                 | N                 |
| sig (p) *                |                    | 1.37E-29 | .049              | .035             | .419              | .126             | .050              |                   |
| sig (ratios) ‡           |                    | N        | N                 | N                | N                 | N                | S                 |                   |

C. Chromosome VIII

| Genotype;<br>Temperature           | Reference Interval |         | <i>CEN8-arg4</i> |                  | <i>arg4-thr1</i> |                  | <i>thr1-cup1</i> |                  |
|------------------------------------|--------------------|---------|------------------|------------------|------------------|------------------|------------------|------------------|
|                                    | Test Interval      |         | <i>arg4-thr1</i> | <i>thr1-cup1</i> | <i>CEN8-arg4</i> | <i>thr1-cup1</i> | <i>CEN8-arg4</i> | <i>arg4-thr1</i> |
| Wild type;<br>33°C                 | P                  | P:N:T   | 629:1:159        | 347:8:395        | 626:2:232        | 371:7:446        | 349:2:136        | 371:0:118        |
|                                    |                    | cM ± SE | 10.5±0.8         | 29.5±1.4         | 14.2±0.9         | 29.6±1.2         | 15.2±1.3         | 12.1±1.0         |
|                                    | T+N                | P:N:T   | 234:0:6          | 138:0:89         | 163:1:5          | 118:1:43         | 407:1:92         | 459:1:43         |
|                                    |                    | cM ± SE | 1.2±0.5          | 19.6±1.6         | 3.2±1.9          | 15.1±2.5         | 9.8±1.0          | 4.9±0.9          |
|                                    | ratio              |         | .12±.05          | .66±.06          | .23±.13          | .51±.09          | .64±.09          | .40±.08          |
|                                    | sig (SE) †         |         | S                | S                | S                | S                | S                | S                |
| sig (p) *                          |                    | 9.75E-3 | 1.98E-8          | 1.93E-5          | .002             | 4.72E-3          | 1.13E-3          |                  |
| <i>pch2Δ<sup>l</sup></i> ;<br>33°C | P                  | P:N:T   | 681:1:167        | 332:10:412       | 681:2:220        | 363:9:452        | 363:0:112        | 332:2:133        |
|                                    |                    | cM ± SE | 10.2±0.8         | 31.3±1.5         | 12.9±0.8         | 30.7±1.3         | 11.8±0.9         | 15.5±1.4         |
|                                    | T+N                | P:N:T   | 224:3:10         | 137:0:80         | 168:3:10         | 112:1:48         | 468:3:47         | 427:2:83         |
|                                    |                    | cM ± SE | 5.9±2.3          | 18.4±1.6         | 7.7±3.0          | 16.8±2.5         | 6.3±1.2          | 9.3±1.1          |
|                                    | ratio              |         | .58±.23          | .59±.06          | .60±.23          | .55±.09          | .53±.11          | .60±.09          |
|                                    | sig (SE) †         |         | N                | S                | N                | S                | S                | S                |
| sig (p) *                          |                    | .237    | .004             | .473             | .049             | 2.68E-3          | 6.35E-11         |                  |
| sig (ratios) ‡                     |                    | S       | N                | N                | N                | N                | N                |                  |
| Wild type;<br>30°C                 | P                  | P:N:T   | 473:0:100        | 265:11:274       | 473:0:180        | 306:11:310       | 306:1:93         | 264:1:136        |
|                                    |                    | cM ± SE | 8.7±0.8          | 30.9±1.9         | 13.8±0.8         | 30.0±1.7         | 12.4±1.3         | 17.7±0.9         |
|                                    | T+N                | P:N:T   | 180:1:13         | 137:0:48         | 101:1:13         | 95:0:14          | 323:0:14         | 290:0:50         |
|                                    |                    | cM ± SE | 4.9±1.8          | 13.0±1.6         | 8.3±2.9          | 6.4±1.6          | 2.1±2.4          | 7.4±1.6          |
|                                    | ratio              |         | .56±.21          | .42±.06          | .60±.22          | .21±.05          | .17±.05          | .42±.06          |
|                                    | sig (SE) †         |         | N                | S                | N                | S                | S                | S                |
| sig (p) *                          |                    | .634    | 4.98E-13         | .166             | 2.00E-15         | .050             | 8.03E-9          |                  |
| <i>pch2Δ<sup>l</sup></i> ;<br>30°C | P                  | P:N:T   | 486:0:85         | 219:12:228       | 486:2:173        | 273:13:321       | 219:0:112        | 273:0:65         |
|                                    |                    | cM ± SE | 7.4±0.7          | 32.7±2.3         | 14.0±1.1         | 32.9±1.9         | 16.9±1.3         | 9.6±1.1          |
|                                    | T+N                | P:N:T   | 175:0:18         | 112:1:64         | 85:0:18          | 65:0:32          | 308:2:66         | 341:0:33         |
|                                    |                    | cM ± SE | 4.6±1.1          | 19.8±2.4         | 8.7±1.9          | 16.5±2.4         | 10.4±1.5         | 4.4±0.7          |
|                                    | ratio              |         | .62±.15          | .60±.09          | .62±.14          | .50±.08          | .61±.10          | .46±.09          |
|                                    | sig (SE) †         |         | S                | S                | S                | S                | S                | S                |
| sig (p) *                          |                    | .012    | 2.65E-13         | .014             | 3.09E-19         | 2.44E-12         | 2.38E-8          |                  |
| sig (ratios) ‡                     |                    | N       | S                | N                | S                | S                | N                |                  |

Table S1, continued. Crossover interference for tetrads was analyzed by coincidence analysis as described by Malkova et al. (2004). For each test interval, tetrads were divided into two groups based on the crossover status of the reference interval, carrying a parental ditype (P) or a tetratype or nonparental ditype (T + N), respectively. For each subset of tetrads, map distances and standard errors of test intervals were determined in centiMorgan (cM  $\pm$  standard error) as described in Materials and Methods.

The “ratio” of the two map distances is taken as an indication of the strength of interference between the reference and the test interval: The lower the ratio, the stronger the interference. Standard errors for ratios are calculated using the application “Analysis of Statistical Significance of Differences Between Two Ratios of Map Distances” from the Stahl website (see Materials and Methods).

Statistical significances are determined in two ways. First, if the absolute value of the difference between the two map distances is greater than twice the standard error, the difference was considered as significant. Second, the distribution of PD, NPD, and TT tetrads was assessed by *G* test. Differences with  $p < 0.05$  indicate deviation from the expected distribution of these three tetrad classes, indicating crossover interference.

† Significance of difference in ratios between reference and test intervals as calculated by comparing standard errors.

\* Significance of difference in ratios between reference and test intervals as calculated by *G* test using the site at <http://faculty.vassar.edu/lowry/VassarStats.html> with information from the site <http://udel.edu/~mcdonald/statgtestgof.html>.

‡ Significances of the differences between ratios between wild-type and *pch2Δ* as calculated by comparing standard errors.
