# Supplementary material for: Pch2 Links Chromosome Axis Remodeling at Future Crossover Sites and Crossover Distribution during Yeast Meiosis
Source: PubMed Central journal article supplement (PMC2708914; doi:10.1371/journal.pgen.1000557), 2009-07-24
Supplement: pgen.1000557.s007.pdf [file pgen.1000557.s007.pdf]

**Table S2.** Non-Mendelian Segregation in WT and *pch2Δ* tetrads at 33°C and 30°C.

| Genotype;<br>Temperature |         | <i>his4</i> | <i>leu2</i> | <i>CEN3::</i><br><i>ADE2</i> | <i>MAT</i> | <i>lys5</i> | <i>met13</i> | <i>cyh2</i> | <i>trp5</i> | <i>CEN8::</i><br><i>URA3</i> | <i>arg4</i> | <i>thr1</i> | <i>cup1</i> |
|--------------------------|---------|-------------|-------------|------------------------------|------------|-------------|--------------|-------------|-------------|------------------------------|-------------|-------------|-------------|
| Wild type;<br>33°C       | 3:1,1:3 | 28,39       | 42,23       | 8,15                         | 15,26      | 19,28       | 38,32        | 12,26       | 28,12       | 8,8                          | 35,18       | 36,46       | 21,31       |
|                          | Other*  | 2           | 2           | 1                            | 2          | 2           | 8            | 3           | 1           |                              | 1           | 4           | 10          |
|                          | Freq.   | .058        | .056        | .020                         | .035       | .040        | .060         | .033        | .034        | .014                         | .046        | .071        | .045        |
| <i>pch2Δ</i> ";<br>33°C  | 3:1,1:3 | 26,106      | 61,18       | 8,56                         | 7,31       | 14,82       | 89,26        | 18,79       | 63,22       | 22,6                         | 34,22       | 39,46       | 23,110      |
|                          | Other*  | 5           | 4           | 4                            | 1          | 5           | 3            | 1           | 3           | 2                            | 2           | 3           | 8           |
|                          | Freq.   | .107        | .064        | .052                         | .031       | .077        | .093         | .078        | .069        | .023                         | .045        | .069        | .107        |
| Wild type;<br>30°C       | 3:1,1:3 | 20,27       | 13,20       | 7,3                          | 13,10      | 14,20       | 20,33        | 12,22       | 14,15       | 0,7                          | 8,24        | 29,33       | 19,26       |
|                          | Other*  | 3           |             |                              |            | 5           | 2            | 2           | 1           |                              | 1           | 2           | 4           |
|                          | Freq.   | .055        | .039        | .012                         | .027       | .040        | .062         | .040        | .034        | .008                         | .037        | .073        | .053        |
| <i>pch2Δ</i> ";<br>30°C  | 3:1,1:3 | 16,39       | 29,12       | 1,27                         | 9,5        | 14,44       | 48,18        | 13,34       | 32,10       | 7,6                          | 15,12       | 28,32       | 14,58       |
|                          | Other*  | 9           | 1           | 4                            |            | 2           | 6            |             | 4           | 1                            |             |             | 13          |
|                          | Freq.   | .065        | .048        | .033                         | .017       | .068        | .078         | .055        | .050        | .015                         | .032        | .071        | .085        |

Number of tetrads with 3:1 or 1:3 segregation are shown, along with the frequency of non-Mendelian segregation for the specified locus.

Other\* 4,0 or 0,4 segregation.
