# Supplementary material for: Pch2 Links Chromosome Axis Remodeling at Future Crossover Sites and Crossover Distribution during Yeast Meiosis
Source: PubMed Central journal article supplement (PMC2708914; doi:10.1371/journal.pgen.1000557), 2009-07-24
Supplement: pgen.1000557.s008.pdf [file pgen.1000557.s008.pdf]

**Table S3.** Spore viabilities in WT and *pch2Δ* strains carrying *spo11* hypomorphic mutations.

| <i>SPO11</i> Genotype | <i>PCH2</i> Genotype | Temp. (°C) | 4:0  | 3:1 | 2:2 | 1:3 | 0:4 | Total | Viability (%) |
|-----------------------|----------------------|------------|------|-----|-----|-----|-----|-------|---------------|
| <i>Wild-type</i>      | <i>Wild-type</i>     | 30         | 880  | 43  | 10  | 2   | 0   | 935   | 98.2          |
| <i>HA/HA</i>          | <i>Wild-type</i>     | 30         | 77   | 14  | 7   | 2   | 0   | 100   | 91.5          |
| <i>yf-HA/HA</i>       | <i>Wild-type</i>     | 30         | 80   | 9   | 2   | 8   | 1   | 100   | 89.8          |
| <i>da-HA/da-HA</i>    | <i>Wild-type</i>     | 30         | 58   | 3   | 10  | 0   | 29  | 100   | 65.3          |
| <i>Wild-type</i>      | <i>Δpch2</i>         | 30         | 862  | 64  | 15  | 0   | 0   | 941   | 97.5          |
| <i>HA/HA</i>          | <i>Δpch2</i>         | 30         | 74   | 13  | 6   | 7   | 0   | 100   | 88.5          |
| <i>yf-HA/HA</i>       | <i>Δpch2</i>         | 30         | 18   | 2   | 6   | 2   | 72  | 100   | 23.0          |
| <i>da-HA/da-HA</i>    | <i>Δpch2</i>         | 30         | 8    | 11  | 19  | 5   | 57  | 100   | 27.0          |
| <i>Wild-type</i>      | <i>Wild-type</i>     | 33         | 1207 | 208 | 41  | 5   | 0   | 1461  | 82.6          |
| <i>HA/HA</i>          | <i>Wild-type</i>     | 33         | 85   | 4   | 10  | 1   | 0   | 100   | 93.0          |
| <i>yf-HA/HA</i>       | <i>Wild-type</i>     | 33         | 64   | 12  | 11  | 0   | 10  | 97    | 80.0          |
| <i>da-HA/da-HA</i>    | <i>Wild-type</i>     | 33         | 50   | 11  | 14  | 7   | 18  | 100   | 67.0          |
| <i>Wild-type</i>      | <i>Δpch2</i>         | 33         | 1279 | 203 | 39  | 2   | 0   | 1523  | 84.0          |
| <i>HA/HA</i>          | <i>Δpch2</i>         | 33         | 84   | 3   | 12  | 1   | 0   | 100   | 92.5          |
| <i>yf-HA/HA</i>       | <i>Δpch2</i>         | 33         | 75   | 4   | 18  | 2   | 1   | 100   | 87.5          |
| <i>da-HA/da-HA</i>    | <i>Δpch2</i>         | 33         | 33   | 20  | 18  | 14  | 5   | 90    | 67.0          |

Spore viability pattern, live:dead (no. tetrads)
